# Supplementary material
Source: MDPI journal article supplement (https://www.mdpi.com/2073-4395/11/6/1151)
Supplement: s1 [file s1]

# Impact of Different Water Management Regimes on the Growth, Productivity, and Resource Use Efficiency of Dry Direct Seeded Rice in Central Punjab-Pakistan

**Supplementary Table S1:** Analysis of variance regarding the effect of irrigation regimes and cultivars on yield and yield contributed attributes of direct seeded rice.

| Traits                | Yield     | Panicle (m <sup>-2</sup> ) | Spikelets (panicle) | Grain filling percentage (%) | 1000-grain weight (g) | Total dry weight (t ha <sup>-1</sup> ) | Harvest index |
|-----------------------|-----------|----------------------------|---------------------|------------------------------|-----------------------|----------------------------------------|---------------|
| <b>Treatments (T)</b> | <b>**</b> | <b>**</b>                  | <b>**</b>           | <b>**</b>                    | <b>ns</b>             | <b>**</b>                              | <b>ns</b>     |
| <b>Cultivar (C)</b>   | <b>**</b> | <b>**</b>                  | <b>ns</b>           | <b>ns</b>                    | <b>**</b>             | <b>**</b>                              | <b>ns</b>     |
| <b>Year (Y)</b>       | <b>ns</b> | <b>ns</b>                  | <b>ns</b>           | <b>ns</b>                    | <b>ns</b>             | <b>ns</b>                              | <b>ns</b>     |
| <b>T × C</b>          | <b>*</b>  | <b>*</b>                   | <b>**</b>           | <b>**</b>                    | <b>ns</b>             | <b>**</b>                              | <b>ns</b>     |
| <b>C × Y</b>          | <b>ns</b> | <b>ns</b>                  | <b>ns</b>           | <b>ns</b>                    | <b>ns</b>             | <b>ns</b>                              | <b>ns</b>     |
| <b>WR × Y</b>         | <b>ns</b> | <b>ns</b>                  | <b>ns</b>           | <b>ns</b>                    | <b>ns</b>             | <b>ns</b>                              | <b>ns</b>     |
| <b>Y × T × C</b>      | <b>ns</b> | <b>ns</b>                  | <b>ns</b>           | <b>ns</b>                    | <b>ns</b>             | <b>ns</b>                              | <b>ns</b>     |

T × C, treatment × cultivar; WR, water regimes; Y, year; ns denotes non-significance at P = 0.05; \*significance at P < 0.05, \*\*significance at P < 0.01

**Supplementary Table S2:** Analysis of variance regarding the effect of irrigation regimes and cultivars on chlorophyll and carotenoid content, leaf area index (LAI) and crop growth rate of direct seeded rice.

| Traits                | Chlorophyll (mg/g FW) | a         | Chlorophyll b (mg/g FW) | Carotenoid (mg/g FW) | content   | Maximum LAI | Crop growth rate (g /m <sup>2</sup> day <sup>-1</sup> ) |
|-----------------------|-----------------------|-----------|-------------------------|----------------------|-----------|-------------|---------------------------------------------------------|
| <b>Treatments (T)</b> | <b>**</b>             | <b>**</b> | <b>**</b>               | <b>**</b>            | <b>**</b> | <b>**</b>   | <b>**</b>                                               |
| <b>Cultivar (C)</b>   | <b>**</b>             | <b>*</b>  | <b>**</b>               | <b>**</b>            | <b>**</b> | <b>**</b>   | <b>**</b>                                               |
| <b>Year (Y)</b>       | <b>ns</b>             | <b>ns</b> | <b>ns</b>               | <b>ns</b>            | <b>ns</b> | <b>ns</b>   | <b>ns</b>                                               |
| <b>T × C</b>          | <b>*</b>              | <b>**</b> | <b>**</b>               | <b>**</b>            | <b>**</b> | <b>**</b>   | <b>**</b>                                               |
| <b>C × Y</b>          | <b>ns</b>             | <b>ns</b> | <b>ns</b>               | <b>ns</b>            | <b>ns</b> | <b>ns</b>   | <b>ns</b>                                               |
| <b>WR × Y</b>         | <b>ns</b>             | <b>ns</b> | <b>ns</b>               | <b>ns</b>            | <b>ns</b> | <b>ns</b>   | <b>ns</b>                                               |
| <b>Y × T × C</b>      | <b>ns</b>             | <b>ns</b> | <b>ns</b>               | <b>ns</b>            | <b>ns</b> | <b>ns</b>   | <b>ns</b>                                               |

T × C, treatment × cultivar; WR, water regimes; Y, year; ns denotes non-significance at P = 0.05; \*significance at P < 0.05, \*\*significance at P < 0.01.
